# Supplementary material for: Demographic and clinical factors associated with different antidepressant treatments: a retrospective cohort study design in a UK psychiatric healthcare setting
Source: PubMed Central journal article supplement — BMJ Open. 2018 Sep 5;8(9):e022170. doi: 10.1136/bmjopen-2018-022170 (PMC6129089; doi:10.1136/bmjopen-2018-022170), 2018-09-05
Supplement: bmjopen-2018-022170supp001.pdf [file bmjopen-2018-022170supp001.pdf]

## Appendix

Table A1: Results from sensitivity analysis. Fully-adjusted multinomial logistic regression analysis investigating the association between demographic and clinical factors with different antidepressant treatments.

|                                                 | Any one SNRI and Mirtazapine | Any one SSRI and Mirtazapine | Any two SSRIs             | Citalopram                | Escitalopram       | Fluoxetine                | Mirtazapine               | Venlafaxine               |
|-------------------------------------------------|------------------------------|------------------------------|---------------------------|---------------------------|--------------------|---------------------------|---------------------------|---------------------------|
| Age                                             | <b>1.04 (1.03 – 1.06)</b>    | <b>1.03 (1.02 – 1.04)</b>    | <b>0.97 (0.96 – 0.99)</b> | <b>1.01 (1.00 – 1.02)</b> | 1.01 (0.99 – 1.03) | <b>0.97 (0.96 – 0.98)</b> | <b>1.03 (1.02 – 1.04)</b> | <b>1.02 (1.01 – 1.04)</b> |
| Gender (a)                                      | 1.00 (0.60 – 1.67)           | 1.32 (0.83 – 2.08)           | 0.95 (0.56 – 1.61)        | 0.96 (0.66 – 1.40)        | 1.06 (0.58 – 2.00) | 1.04 (0.71 – 1.54)        | <b>2.62 (1.89 – 3.64)</b> | 1.15 (0.76 – 1.75)        |
| Race (White)                                    | 1.19 (0.71 – 2.01)           | 0.95 (0.60 – 1.51)           | 0.80 (0.50 – 1.30)        | 1.12 (0.78 – 1.61)        | 1.90 (0.98 – 3.74) | 1.23 (0.85 – 1.78)        | 0.75 (0.54 – 1.04)        | 1.34 (0.87 – 2.06)        |
| Past Inpatient: Yes (b)                         | 1.13 (0.49 – 2.62)           | 1.24 (0.58 – 2.65)           | 0.97 (0.41 – 2.27)        | 0.90 (0.43 – 1.90)        | 0.60 (0.14 – 2.54) | 0.47 (0.21 – 1.05)        | 0.71 (0.38 – 1.32)        | 0.70 (0.31 – 1.51)        |
| Past Benzodiazepine Use: Yes (b)                | 1.39 (0.75 – 2.57)           | 1.04 (0.56 – 1.93)           | 1.63 (0.82 – 3.24)        | 1.57 (0.92 – 2.67)        | 1.78 (0.80 – 3.98) | 0.88 (0.48 – 1.60)        | <b>1.62 (1.04 – 2.55)</b> | 1.68 (0.98 – 2.89)        |
| Past Mood Stabiliser Use: Yes (b)               | <b>2.61 (1.15 – 5.91)</b>    | 1.22 (0.47 – 3.17)           | 1.46 (0.50 – 4.30)        | 0.96 (0.39 – 2.35)        | 2.60 (0.93 – 7.21) | 1.53 (0.65 – 3.60)        | 1.28 (0.62 – 2.63)        | <b>3.08 (1.51 – 6.30)</b> |
| Past Antidepressant Use: Yes (b)                | <b>3.70 (1.55 – 8.86)</b>    | 1.06 (0.59 – 1.93)           | <b>0.54 (0.30 – 0.98)</b> | 0.73 (0.48 – 1.12)        | 1.58 (0.72 – 3.46) | 1.28 (0.81 – 2.02)        | 0.97 (0.63 – 1.48)        | 1.23 (0.72 – 2.12)        |
| Has had Psychotherapy treatment before: Yes (b) | 0.65 (0.31 – 1.37)           | 0.90 (0.47 – 1.71)           | 0.92 (0.44 – 1.94)        | 0.52 (0.28 – 1.01)        | 1.05 (0.43 – 2.57) | 0.88 (0.50 – 1.58)        | <b>0.56 (0.33 – 0.96)</b> | 0.77 (0.41 – 1.42)        |
| Has been referred to IAPT services: Yes (b)     | <b>1.80 (1.09 – 2.98)</b>    | 0.98 (0.63 – 1.54)           | 0.81 (0.50 – 1.31)        | 0.95 (0.68 – 1.36)        | 1.10 (0.61 – 2.01) | <b>0.64 (0.45 – 0.93)</b> | 0.87 (0.63 – 1.20)        | 0.75 (0.50 – 1.13)        |
| Psychotic Symptom: $\geq 2$ mentions (c)        | 0.90 (0.45 – 1.81)           | 1.57 (0.85 – 2.91)           | 0.98 (0.49 – 1.96)        | 1.54 (0.90 – 2.65)        | 0.73 (0.27 – 2.02) | 1.39 (0.80 – 2.40)        | 1.20 (0.75 – 1.87)        | 1.24 (0.70 – 2.22)        |
| Cognitive Symptom: $\geq 2$ mentions (c)        | 1.35 (0.70 – 2.63)           | 1.38 (0.73 – 2.61)           | 1.17 (0.58 – 2.37)        | 0.95 (0.52 – 1.72)        | 0.95 (0.35 – 2.56) | 0.80 (0.42 – 1.49)        | 0.71 (0.43 – 1.17)        | 1.32 (0.73 – 2.40)        |
| Affective Symptom: $\geq 2$ mentions (c)        | 0.54 (0.28 – 1.04)           | 0.60 (0.32 – 1.12)           | 0.93 (0.47 – 1.83)        | <b>0.58 (0.36 – 0.92)</b> | 0.70 (0.33 – 1.51) | <b>0.42 (0.25 – 0.68)</b> | 0.80 (0.51 – 1.25)        | 0.92 (0.54 – 1.56)        |
| Somatic Symptom: $\geq 2$ mentions (c)          | 1.42 (0.74 – 2.71)           | 1.02 (0.55 – 1.90)           | 0.90 (0.47 – 1.75)        | 0.66 (0.40 – 1.09)        | 0.88 (0.40 – 1.96) | 1.09 (0.66 – 1.81)        | <b>1.60 (1.04 – 2.46)</b> | 0.71 (0.42 – 1.22)        |
| Past Suicide Ideation: Yes (b)                  | 1.40 (0.79 – 2.47)           | 1.11 (0.64 – 1.91)           | 1.03 (0.57 – 1.86)        | 0.80 (0.50 – 1.29)        | 0.80 (0.36 – 1.79) | 0.84 (0.53 – 1.35)        | 0.91 (0.61 – 1.37)        | 0.82 (0.49 – 1.38)        |
| Past Suicide Attempt: Yes (b)                   | 0.94 (0.49 – 1.83)           | 1.46 (0.81 – 2.61)           | 1.79 (0.97 – 3.29)        | 1.26 (0.76 – 2.08)        | 0.62 (0.23 – 1.64) | 1.56 (0.97 – 2.52)        | 1.11 (0.71 – 1.74)        | 1.12 (0.65 – 1.95)        |

p-value: ‡ < 0.05; †† < 0.001

a – Reference: Female

b – Reference: No

c – Reference: 0 or 1 mention of the symptom. Individuals with zero or one mention of a symptom in the 12-month period prior to the observation frame were considered to be undergoing a milder experience of the symptom compared to individuals who had two or more mentions of the symptom in the 12-month period.

Table A2: Results from sensitivity analysis. Fully-adjusted multinomial logistic regression analysis investigating the association between demographic and clinical factors with different antidepressant treatments in the adult-only cohort (n = 1248).

|                                             | Any one SNRI and Mirtazapine | Any one SSRI and Mirtazapine | Any two SSRIs             | Citalopram                | Escitalopram       | Fluoxetine                | Mirtazapine               | Venlafaxine               |
|---------------------------------------------|------------------------------|------------------------------|---------------------------|---------------------------|--------------------|---------------------------|---------------------------|---------------------------|
| Age                                         | <b>1.04 (1.02 – 1.05)</b>    | <b>1.03 (1.01 – 1.05)</b>    | 0.99 (0.97 – 1.02)        | 1.00 (0.99 – 1.02)        | 1.00 (0.99 – 1.03) | 0.99 (0.98 – 1.01)        | <b>1.03 (1.01 – 1.04)</b> | <b>1.02 (1.01 – 1.04)</b> |
| Gender (a)                                  | 0.88 (0.51 – 1.50)           | 1.28 (0.79 – 2.08)           | 0.89 (0.47 – 1.70)        | 0.90 (0.50 – 1.36)        | 1.02 (0.52 – 2.01) | 1.24 (0.78 – 2.00)        | <b>2.33 (1.63 – 3.34)</b> | 1.08 (0.69 – 1.70)        |
| Past Inpatient: Yes (b)                     | 1.08 (0.44 – 2.62)           | 0.96 (0.41 – 2.21)           | 0.30 (0.07 – 1.26)        | 0.79 (0.34 – 1.83)        | 0.58 (0.10 – 3.22) | 0.51 (0.19 – 1.37)        | 0.60 (0.30 – 1.20)        | 0.59 (0.25 – 1.40)        |
| Past Benzodiazepine Use: Yes (b)            | 1.44 (0.76 – 2.75)           | 1.26 (0.66 – 2.43)           | <b>2.89 (1.30 – 6.43)</b> | 1.56 (0.87 – 2.80)        | 1.85 (0.79 – 4.35) | 1.14 (0.58 – 2.25)        | <b>1.92 (1.18 – 3.12)</b> | <b>1.87 (1.04 – 3.33)</b> |
| Past Antipsychotic Use: Yes (b)             | <b>2.01 (1.14 – 3.55)</b>    | 1.30 (0.73 – 2.27)           | 1.03 (0.47 – 2.27)        | 1.09 (0.66 – 1.81)        | 1.67 (0.80 – 3.52) | 1.01 (0.57 – 1.80)        | 1.14 (0.74 – 1.75)        | 1.50 (0.90 – 2.50)        |
| Past Mood Stabiliser Use: Yes (b)           | 2.25 (0.96 – 5.26)           | 1.02 (0.36 – 2.86)           | 1.11 (0.30 – 4.22)        | 0.77 (0.28 – 2.10)        | 2.52 (0.87 – 7.29) | 1.71 (0.67 – 4.35)        | 1.24 (0.58 – 2.64)        | <b>2.65 (1.23 – 5.70)</b> |
| Past Antidepressant Use: Yes (b)            | <b>2.76 (1.12 – 6.81)</b>    | 0.92 (0.48 – 1.78)           | <b>0.40 (0.19 – 0.85)</b> | 0.70 (0.42 – 1.13)        | 2.19 (0.85 – 5.67) | 1.04 (0.59 – 1.86)        | 0.80 (0.50 – 1.30)        | 1.08 (0.59 – 2.00)        |
| Has been referred to IAPT services: Yes (b) | <b>2.04 (1.20 – 3.47)</b>    | 0.97 (0.60 – 1.59)           | 0.91 (0.50 – 1.69)        | 0.98 (0.66 – 0.47)        | 1.34 (0.68 – 2.60) | 0.97 (0.61 – 1.53)        | 0.93 (0.64 – 1.34)        | 0.82 (0.52 – 1.28)        |
| Psychotic Symptom: >=2 mentions (c)         | 0.80 (0.38 – 1.67)           | 1.70 (0.87 – 3.31)           | 0.89 (0.34 – 2.21)        | 1.67 (0.92 – 3.03)        | 0.72 (0.23 – 2.18) | 1.45 (0.75 – 2.81)        | 1.22 (0.74 – 2.03)        | 1.18 (0.63 – 2.21)        |
| Cognitive Symptom: >=2 mentions (c)         | 1.14 (0.57 – 2.30)           | 1.28 (0.65 – 2.56)           | 0.89 (0.35 – 2.25)        | 0.84 (0.43 – 1.62)        | 0.99 (0.34 – 2.88) | 0.78 (0.37 – 1.64)        | 0.60 (0.35 – 1.02)        | 1.11 (0.58 – 2.11)        |
| Affective Symptom: >=2 mentions (c)         | 0.51 (0.25 – 1.01)           | 0.59 (0.30 – 1.14)           | 0.92 (0.41 – 2.08)        | <b>0.49 (0.29 – 0.82)</b> | 0.51 (0.23 – 1.15) | <b>0.36 (0.20 – 0.67)</b> | 0.79 (0.53 – 1.28)        | 0.93 (0.53 – 1.66)        |
| Somatic Symptom: >=2 mentions (c)           | 1.40 (0.72 – 2.75)           | 0.99 (0.52 – 1.92)           | 1.11 (0.50 – 2.50)        | 0.66 (0.38 – 1.16)        | 1.00 (0.42 – 2.36) | 1.17 (0.63 – 2.18)        | <b>1.63 (1.02 – 2.59)</b> | 0.69 (0.40 – 1.22)        |
| Past Suicide Ideation: Yes (b)              | 1.37 (0.76 – 2.48)           | 1.08 (0.60 – 1.95)           | 0.89 (0.40 – 1.98)        | 0.79 (0.47 – 1.35)        | 0.53 (0.20 – 1.39) | 0.92 (0.51 – 1.67)        | 0.92 (0.60 – 1.44)        | 0.84 (0.50 – 1.48)        |
| Past Suicide Attempt: Yes (b)               | 1.03 (0.51 – 2.09)           | 1.44 (0.76 – 2.77)           | 1.75 (0.77 – 4.00)        | 1.45 (0.81 – 2.58)        | 0.44 (0.12 – 1.62) | <b>2.06 (1.11 – 3.84)</b> | 1.18 (0.72 – 1.95)        | 1.17 (0.64 – 2.16)        |

p-value: ‡ <0.05; †† < 0.001

a – Reference: Female

b – Reference: No

c – Reference: 0 or 1 mention of the symptom. Individuals with zero or one mention of a symptom in the 12-month period prior to the observation frame were considered to be undergoing a milder experience of the symptom compared to individuals who had two or more mentions of the symptom in the 12-month period.
